# Supplementary material
Source: HighWire-hosted journal article supplement (https://bmjopenquality.bmj.com/highwire/filestream/145537/field_highwire_adjunct_files/0/bmjoq-2022-001981supp001_data_supplement.pdf)
Supplement: bmjoq-2022-001981supp001_data_supplement.pdf [file bmjoq-2022-001981supp001_data_supplement.pdf]

Table Appendix: Post hoc tests

| Dependent Variable        |    |    | Mean Difference | Std. Error | Sig.  | 95% Confidence Interval |             |
|---------------------------|----|----|-----------------|------------|-------|-------------------------|-------------|
|                           |    |    |                 |            |       | Lower Bound             | Upper Bound |
| Financial improvements    | LL | HL | -0.445          | 0.634      | 0.484 | -1.70                   | 0.81        |
|                           |    | HH | -0.668          | 0.636      | 0.295 | -1.93                   | 0.59        |
|                           | HL | LL | 0.445           | 0.634      | 0.484 | -0.81                   | 1.70        |
|                           |    | HH | -0.224          | 0.382      | 0.559 | -0.98                   | 0.53        |
|                           | HH | LL | 0.668           | 0.636      | 0.295 | -0.59                   | 1.93        |
|                           |    | HL | 0.224           | 0.382      | 0.559 | -0.53                   | 0.98        |
| Improved patient flows    | LL | HL | -LL0*           | 0.395      | 0.012 | -1.78                   | -0.22       |
|                           |    | HH | -1.267*         | 0.393      | 0.002 | -2.05                   | -0.49       |
|                           | HL | LL | LL0*            | 0.395      | 0.012 | 0.22                    | 1.78        |
|                           |    | HH | -0.267          | 0.237      | 0.262 | -0.74                   | 0.20        |
|                           | HH | LL | 1.267*          | 0.393      | 0.002 | 0.49                    | 2.05        |
|                           |    | HL | 0.267           | 0.237      | 0.262 | -0.20                   | 0.74        |
| Meeting new patient needs | LL | HL | -1.250*         | 0.338      | 0.000 | -1.92                   | -0.58       |
|                           |    | HH | -1.724*         | 0.337      | 0.000 | -2.39                   | -1.06       |
|                           | HL | LL | 1.250*          | 0.338      | 0.000 | 0.58                    | 1.92        |
|                           |    | HH | -0.474*         | 0.223      | 0.036 | -0.92                   | -0.03       |
|                           | HH | LL | 1.724*          | 0.337      | 0.000 | 1.06                    | 2.39        |
|                           |    | HL | 0.474*          | 0.223      | 0.036 | 0.03                    | 0.92        |

\*. The mean difference is significant at the 0.05 level.
